1 **A direct comparison of four high risk human papilloma virus tests**  
2 **versus the cobas test for detecting cervical intraepithelial neoplasia and**  
3 **cervical cancer**

4

5 Peng Xue,<sup>a, b,\*</sup> Li-Li Gao,<sup>c</sup> Jian Yin,<sup>a</sup> Li-Li Han,<sup>c</sup> Jing Zhao,<sup>a, b</sup> Li Li,<sup>a</sup> Samuel Seery,<sup>d</sup>  
6 Xue-Yan Han,<sup>b</sup> Ting-Yuan Li,<sup>a</sup> Yu Jiang,<sup>b</sup> Jie Shen,<sup>c,#</sup> and Wen Chen<sup>a,#</sup>

7

8 <sup>a</sup>Department of Epidemiology, National Cancer Center/Cancer Hospital, Chinese  
9 Academy of Medical Sciences and Peking Union Medical College, Beijing 100021, PRC

10 <sup>b</sup>School of Public Health, Chinese Academy of Medical Sciences and Peking Union  
11 Medical College, Beijing 100730, PRC

12 <sup>c</sup>Department of Women's Health Care, Beijing Obstetrics and Gynecology Hospital,  
13 Capital Medical University Beijing Maternal and Child Health Care Hospital, Beijing  
14 100026, PRC

15 <sup>d</sup>School of Humanities and Social Sciences, Chinese Academy of Medical Sciences and  
16 Peking Union Medical College, Beijing, 100730, PRC

17

18 Peng Xue, Li-Li Gao and Jian Yin contributed equally to this work.

19

20 Running title: Comparison clinical performances of four HR-HPV tests

21

22 <sup>#</sup>Address corresponding to Jie Shen, shenjielujun96@126.com; Wen Chen,  
23 chenwen@cicams.ac.cn.

24 <sup>\*</sup>Present address: Peng Xue, Department of Epidemiology, National Cancer  
25 Center/Cancer Hospital, Chinese Academy of Medical Sciences and Peking Union  
26 Medical College, 17 South Pan Jia Yuan Lane, Beijing 100021.



28 **ABSTRACT**

29 This study is to evaluate performances and genotyping capabilities of four human  
30 papilloma virus (HR-HPV) tests based on real-time polymerase chain reaction (PCR)  
31 technology platforms compared with the cobas test. Discordant results were further  
32 analyzed using INNO-LiPA HPV genotyping test, the gold standard laboratory test to  
33 determine presence and type of HPV infection. Over 200 samples from Hospital patients  
34 were collected and analyzed using five HR-HPV tests. Women with positive test results  
35 were referred directly to colposcopy. If a positive result was returned, biopsies were  
36 administered for pathological classification. Clinical performances and genotyping  
37 capabilities between the four HR-HPV and cobas tests were compared and contrasted.  
38 High levels of agreement were observed, though all HR-HPV tests presented  
39 discrepancies compared with the cobas test. Cervical intraepithelial neoplasia Grade 2 or  
40 higher lesions (CIN2+) was set as the threshold, and all five tests performed with equally  
41 high sensitivity. Lower levels of specificity were observed across all five tests. Results  
42 suggest the four HR-HPV tests analyzed are as effective as the cobas test in genotyping  
43 capacities and diagnosing CIN. Therefore, these test kits should be used for HPV  
44 screening, especially in developing nations because they are cost effective and reliable.  
45 Minor discrepancies between tests are generally unavoidable though this may add  
46 complexity to the clinical decision-making process. As such, we recommend that efforts  
47 be made to standardize HPV genotyping tests as well as to optimize clinical sensitivity  
48 and specificity. Focusing on these issues will drive the development of HPV detection  
49 techniques, therefore save lives.

50 **KEY WORDS** HR-HPV, cervical screening, Real-time PCR, cobas HPV.

51

52

53

54

## 55 INTRODUCTION

56 Cervical cancer is associated with a substantial burden of disease and is the cause of a  
57 substantial number of deaths among women in developing countries (1). Emerging  
58 wealth evidence confirms that persistent infection with high risk human papillomavirus  
59 (HR-HPV) is associated with more than 99% of all cervical cancers (2, 3). In particular,  
60 HPV 16 and 18 are known to be the most common HPV types, leading to an estimated  
61 70% of all cervical cancers (4, 5).

62 Accordingly, it has been proposed that HPV detection methods as a alone screening tool  
63 for the detection of high-grade cervical intraepithelial neoplasia and cervical cancer (6).  
64 The Hybrid Capture 2 (HC2) test is based on a signal-amplified hybridization method and  
65 has received approval from the Food and Drug Administration (FDA) yet (7-9), this test  
66 can only determine whether HPV infection is present, it neither determines specific  
67 genotypes, such as HPV 16 and 18, nor is it capable of identifying between single and  
68 multiple HPV infections.

69 Recently, various tests based on real time polymerase chain reaction (PCR) have been  
70 developed. Compared with traditional HC2 tests, the real-time PCR method has several  
71 the advantages, such as; convenience of use, high throughput, less time and lower cost.  
72 The most frequently administered HPV genotyping test in trials is the cobas HPV test  
73 (Roche Systems Inc., Branchburg, NJ, USA). The advantage of the cobas test is that it is a  
74 fully automated real-time PCR DNA amplification test which has been approved for  
75 screening by the FDA in 2014 (10). The cobas test is initially developed with the clinical  
76 cut-off values (11) and this enhances the level of specificity thereby maximizing the  
77 predictive value of oncogenic risk of CIN2+. Unfortunately, the cobas test is not flawless,  
78 requiring access to highly specialized, bulky instrumentation for sample pretreatment and  
79 detection purposes. The cobas HPV system weighs over 150 kg and is 166 cm wide (12).  
80 Each detection cost is also comparatively high at \$35+ or more per test. These issues  
81 make the cobas HPV test impractical and inhibitive for developing nations with less

82 developed infrastructures.

83 Recently in China, numerous commercially available HR-HPV tests based on real-time  
84 PCR have been available in hospitals and laboratories. Unfortunately, prior to 2015 China  
85 did not regulate HPV testing around clinical sensitivity or specificity thresholds, and only  
86 recently have researchers actually investigated the performances of commonly used  
87 HR-HPV tests. Therefore, it would seem necessary to conduct a more comprehensive  
88 investigation into the most accessible HPV test kits in order to promote best screening  
89 practice for health services in developing countries.

90 This study focused on four widely used HR-HPV test kits i.e. Tellgen, HybriBio,  
91 Liferiver and Sansure, all of which are based on real-time PCR technology. Over 200  
92 samples were collected to appraise and compare the efficacy of each test against the  
93 cobas HPV test for detecting HR-HPV DNA. Any discrepant genotyping outcomes were  
94 compared with HPV genotyping using INNO-LiPA HPV test in order to determine levels  
95 of agreement with the gold standard laboratory diagnostic tool. Levels of sensitivity and  
96 specificity HR-HPV test used for diagnosing cervical intraepithelial neoplasia (CIN) and  
97 cervical cancer were then analyzed and contrasted. The overarching aim was to determine  
98 whether the more cost effective and more easily administered HR-HPV tests can be used  
99 for national screening campaigns in developing countries, like China.

100

## 101 **MATERIALS AND METHODS**

### 102 **Study design and patients**

103 In order to evaluate genotyping capacities and clinical performance of the four HR-HPV  
104 tests, we collected a total of 214 cytology samples with cervical lesions results from  
105 December 2016 to April 2017. Samples were originally taken from 214 women aged 23  
106 to 65 years whom had visited Peking University First Hospital, for routine examination.  
107 Cytology samples collected were transferred into PreservCyt solution (Hologic Inc.,  
108 Bedford, MA) and then stored at 4°C for testing.

109 HPV tests were performed using cobas (Roche Molecular Systems Inc., Roche, Shanghai,  
110 China), Tellgen (Nucleic Acid Detection Kit for HPV and 16/18 genotyping, Tellgen,  
111 Shanghai, China), HybriBio (14 HR-HPV with 16/18 Genotyping Real-time PCR Kit,  
112 HybriBio, Guangdong, China), Liferiver (HPV Genotyping Real time PCR Kit, Liferiver,  
113 Shanghai, China), and Sansure (HR-HPV DNA Fluorescence Diagnostic Kit, Sansure,  
114 Hunan, China) sequentially across specimens. Any discrepant genotyping outcomes  
115 between tests were compared using INNO-LiPA HPV test (INNO-LiPA HPV Genotyping  
116 Extra, Innogenetics, Belgium).

117 Women with positive test results were referred directly to colposcopy. If colposcopy  
118 returned a positive test result, four-quadrant biopsies were taken. If the colposcopy was  
119 unable to detect lesions, a random biopsy was obtained at the squamocolumnar junction  
120 in that quadrant at 2, 4, 8, or 10 o'clock.

121 Informed consent was requested and consequently approved by all participants in this  
122 study. This study was formally approved by the institutional review boards of the Cancer  
123 Hospital, Chinese Academy of Medical Sciences (NO.12-72/606) and National Health  
124 and Family Planning Commission of the People's Republic of China (No.2015071).

### 125 **Real-time PCR HPV testing**

126 A sample of 1 mL of liquid cytology was separated for investigation using five real-time  
127 PCR HPV tests i.e. cobas, Tellgen, HybriBio, Liferiver and Sansure all of which are  
128 based on TaqMan technology and reportedly can detect 14 HR-HPV genotypes (HPV16,  
129 18, 31, 33, 35, 39, 45, 51, 52, 56, 58, 59, 66 and 68). Besides the 14 HPV types, Liferiver  
130 and Sansure can also detect HPV82.

131 The cobas HPV test has a differentiating feature; the cobas 4800 system is a highly  
132 automated instrument for DNA extraction using Roche HPV DNA kit, PCR amplification  
133 on the cobas x480 instrument and detection on the cobas z480 Analyzer. The remaining  
134 four HR-HPV tests i.e. Tellgen, HybriBio, Liferiver and Sansure perform part of manual  
135 DNA extraction using related HPV DNA kits and PCR amplification with a mixture of

136 multiple probes and detection on the ABI 7500 or SLAN-96P automated analyzer.  
137 The experimental conditions for the five HR-HPV tests follow the guidelines provided  
138 within the associated protocols. During each run, both positive and negative controls were  
139 included to ensure proper PCR responses were not subjected to carry over contamination.  
140 The resulting fluorescence from the reaction is then measured to determine whether HPV  
141 is present in the sample.

#### 142 **INNO-LiPA HPV test**

143 The INNO-LiPA HPV test is based on reverse line hybridization using SPF10 primers  
144 (13). Part of the L1 region of the HPV genome is amplified by multiplex PCR, and  
145 includes biotin-labeled primer which is denatured and hybridized to strip. It can identify  
146 28 HPV types containing 15 HR-HPV (16, 18, 31, 33, 35, 39, 45, 51, 52, 56, 58, 59, 68,  
147 73 and 82), 3 probable HR-HPV (26, 53, 66) and 10 low-risk HPV (HPV6, 11, 26, 40, 43,  
148 44, 54, 69, 70, 71 and 74). Results are interpreted using direct-vision method or utilizing  
149 the analytical software, LIRAS for LiPA HPV.

#### 150 **Statistical analysis**

151 SAS 9.2 software (SAS Institute Inc., Cary, NC) was used for statistical analysis. The  
152 agreement rates and corresponding Kappa coefficients with 95% confidence intervals  
153 (CIs) were calculated to estimate the level of agreement between the four HR-HPV tests  
154 and the cobas HPV test. The Median score and Mann-Whitney U tests were calculated *p*  
155 values for the median four HR-HPV and cobas tests Cycle threshold (Ct) values for  
156 concordant vs. discordant positive specimens. Chi square test was used to compare the  
157 HPV positive rates, sensitivity, specificity, positive predictive value (PPV) and negative  
158 predictive value (NPV). *P* values less than 0.05 (two-sided) were considered statistically  
159 significant.

160

## 161 **RESULTS**

### 162 **Overall HPV DNA positivity with the five HR-HPV tests**

163 Of the 214 cytology samples, 4 cases were considered invalid due to lack of remnant  
164 DNA and were thereby excluded. The remaining 210 samples were included for analysis.  
165 Table 1 displays the HPV DNA positive results with histopathologic grading. Data  
166 demonstrate an overall positive correlation of HPV DNA with the histopathologic grading  
167 ( $p < 0.0001$ ), except for the positive rate of HPV 18 due to the relative small number of  
168 HPV18 type cases within the sample. In 210 cytology samples, overall HPV positive  
169 rates ranged from 50.0% to 53.3%. None of the included tests performed less well in  
170 overall HPV positive rate ( $p = 0.964$ ).

### 171 **Agreement among tests**

172 Table 2 displays independent levels of agreement for each of the four HR-HPV tests  
173 compared with the cobas test. The four HR-HPV tests, compared with the cobas test  
174 demonstrated a high level of agreement with 95.24%, 95.71%, 95.24% and 94.76% of all  
175 samples ( $\kappa = 0.905, 0.914, 0.905$  and  $0.895$ , respectively). In cases infected with  
176 HPV 16, levels of agreement in the four HR-HPV tests against those analyzed using the  
177 cobas HPV test were 96.19%, 98.10%, 98.10% and 95.24% ( $\kappa = 0.908, 0.953, 0.954$   
178 and  $0.885$ , respectively). In cases infected with HPV 18, agreement with the cobas HPV  
179 test were 99.52%, 98.10%, 98.57% and 98.57% ( $\kappa = 0.939, 0.740, 0.835$  and  $0.835$ ,  
180 respectively). HR-HPVs other than HPV types 16 and 18 were also analyzed, and again  
181 performed with equally high levels of agreement compared with those of the cobas HPV  
182 test with 90.48%, 91.90%, 89.52% and 87.62% ( $\kappa = 0.783, 0.813, 0.768$  and  $0.726$ ,  
183 respectively). 22 discrepancies were eventually resolved using the INNO-LiPA HPV test  
184 (see Table 4). 10 cases were negative while LiPA system identified 12 additional positive  
185 cases. Histopathologic analysis revealed 6 cases were CIN2+ and 16 were  $< CIN2$ .  
186 Median Ct values of concordance and discordance in the four HR-HPV tests and cobas  
187 test results are presented in Table 3. All concordant cases between the four HR-HPV as  
188 well as the cobas HPV tests were significantly lower median cobas Ct values compared to  
189 those discordant cases ( $p < 0.001$ ).



## 190 **Clinical performance of the five HR-HPV tests for detection of CIN2+**

191 Clinical performances of each of the HR-HPV tests as well as the cobas HPV test to a  
192 reference standard of CIN2+ were analyzed (see Table 5). Data revealed that all tests  
193 were similarly sensitive with 94.59%, 94.59%, 94.59%, 95.59% and 93.24%, respectively.  
194 However, each of the tests was significantly less specific. HR-HPV tests i.e. Tellgen,  
195 HybriBio, Liferiver, Sansure and the cobas HPV test resulted in 72.79%, 73.53%, 71.32%,  
196 69.86% and 73.53%, specificity. Overall, there was no significant difference in either  
197 sensitivity ( $p = 0.971$ ) or specificity ( $p = 0.953$ ) across these HR-HPV tests for detecting  
198 CIN2+.

199

## 200 **DISCUSSION**

201 This study focused on four readily available and widely used HR-HPV test kits i.e. the  
202 Tellgen, HybriBio, Liferiver, and the Sansure, all of which are based on real-time PCR  
203 technology. Clinical performance and genotyping capabilities were compared with the  
204 cobas HPV test. Discrepancies were further compared with HPV genotyping using  
205 INNO-LiPA HPV test, the gold standard laboratory diagnostic test. Since approval by the  
206 U.S. FDA and validation by numerous studies (14, 15), the cobas HPV test is as effective  
207 as the Hybrid Capture 2 HPV test which has become a gold standard screening tool for  
208 evaluating the efficacy of the newly developed HPV methods (16). In addition,  
209 INNO-LiPA has been widely used in clinical trials focusing on HPV vaccine research for  
210 the identification of specific sequences in the L1 region of the HPV genome of 28 HPV  
211 types (17).

212 Considering that the four HR-HPV tests; the Tellgen, HybriBio, Liferiver, and Sansure  
213 have become widely available within hospitals and laboratories in China, there were few  
214 studies which compare and then verify test performances simultaneously. In this study, by  
215 using CIN2+ as a threshold and reference standard, it became possible to compare levels  
216 of sensitivity and specificity of all four HR-HPV tests which ultimately performed very

217 similar when compared with the cobas HPV test. Similar HPV-DNA detection rates were  
218 also discovered compared with both the cobas HPV test and the INNO-LiPA HPV test.  
219 This study ultimately found that these HR-HPV tests and cervical histopathology  
220 positively correlate. All HPV tests detected HPV from CIN2+ samples in approximately  
221 90.3% to 100.0% of cases therefore this analysis demonstrates that these cheaper, simpler  
222 HR-HPV tests perform equally at detecting HPV infection in cervical lesions.

223 All four HR-HPV tests demonstrated high levels of agreement with the cobas HPV test  
224 for detecting HR-HPV DNA. However, discrepancies detected by these HR-HPV tests in  
225 22 (10.5%) of the 210 samples, thus genotyping using INNO-LiPA was performed to  
226 explore potential causes. The cobas-negative/four HR-HPV tests-positive samples  
227 resulted in approximately 70% of the all discrepancies, the four HR-HPV-positive results  
228 found in half of the cases were not confirmed by LiPA, whereas, the LiPA detection test  
229 detected the presence of different low-risk genotypes, thus representing false-positive  
230 results though the four HR-HPV tests. These differences may lead to over-referral to  
231 colposcopy and potentially false prognostic stress in healthy women.

232 On the other hand, 7 samples were cobas-positive/four HR-HPV-negative; 5 samples  
233 returned positive for HR-HPV using the LiPA system, with 3 cases bearing a CIN2+,  
234 which were later identified as HPV 33 and 16. It should be noted that LiPA does not have  
235 an established clinical cut off value and it was expected that the positive sample below  
236 the critical cut off point would be detected using these HR-HPV tests. Genotype-specific  
237 results detected using these HR-HPV tests showed that samples with discordant  
238 genotyping results had Ct values significantly closer to the test limits of detection which  
239 was consistent with genotyping samples. This indicates that these samples may have  
240 contained a lower viral load based on high Ct values and are more likely to produce  
241 discordant results across the tests (18). These minor discrepancies were considered  
242 unavoidable due to different cut-off values and a lack of standardization. No test is  
243 absolutely sensitive or specific and we therefore suggest that cut-off values for HR-HPV

244 tests need to be adjusted for optimization in order to reduce false-positive results and  
245 without sacrificing sensitivity in detecting HR-HPV.

246 This study had some limitations that should be addressed. First of all, this is a preliminary  
247 study with a relatively small sample (n = 210). Those results led to a high-quality  
248 appraisal of four commonly used HR-HPV tests however due to the small sample size our  
249 recommendations remain tentative. Additional research with a large sample size is  
250 required to verify these findings. Secondly, the total HR-HPV concordance rates were  
251 perhaps overestimated due to the fact that detection methods identify HPV types as a pool  
252 rather than each HPV Genotype. Further research is required to analyse test capabilities  
253 for each HPV genotype. A more powerful form of sequencing generation could also be  
254 used, which may provide more definitive HPV genotype information. Lastly, manual  
255 operation of the four HR-HPV tests were time consuming and labor intensive and were  
256 therefore more likely to suffer potential sample cross-contamination. We suggest the  
257 manufacturer should use an automated DNA extraction system if conditions are available  
258 in order to minimize potential cross-contamination as well as to reduce hands-on time.

259 Ultimately, this study demonstrates that the four included HR-HPV tests have strong  
260 levels of agreement and similar clinical performance when compared with the cobas HPV  
261 test. Therefore, nations with less developed healthcare systems should consider using one  
262 of these test kits for HPV and for national cervical cancer screening. Slight discrepancies  
263 between tests are generally unavoidable. It is therefore recommended that HPV  
264 genotyping tests should be optimized and standardized around test sensitivity and  
265 specificity. This will enhance HPV detection techniques and reduce the burden of  
266 cervical cancer in developing regions and countries. Further research with larger samples  
267 and comparison with various HPV detection methods is of course required.

268

## 269 **ACKNOWLEDGMENTS**

270 This study was supported by National Natural Science Foundation of China

271 (NO.71373166)

272 The authors have declared that no competing interest exists.

273

## 274 REFERENCES

275 1. Shi JF, Canfell K, Lew JB, Qiao YL. 2012. The burden of cervical cancer in China: synthesis of the  
276 evidence. *Int J Cancer* 130:641-52.10.1002/ijc.26042

277 2. Smith JS, Lindsay L, Hoots B, Keys J, Franceschi S, Winer R, Clifford GM. 2007. Human  
278 papillomavirus type distribution in invasive cervical cancer and high-grade cervical lesions: a meta-analysis  
279 update. *Int J Cancer* 121:621-32.10.1002/ijc.22527

280 3. Sundstrom K, Eloranta S, Sparen P, Arnheim Dahlstrom L, Gunnell A, Lindgren A, Palmgren J, Ploner A,  
281 Sanjeevi CB, Melbye M, Dillner J, Adami HO, Ylitalo N. 2010. Prospective study of human  
282 papillomavirus (HPV) types, HPV persistence, and risk of squamous cell carcinoma of the cervix. *Cancer*  
283 *Epidemiol Biomarkers Prev* 19:2469-78.10.1158/1055-9965.EPI-10-0424

284 4. Kjaer SK, Frederiksen K, Munk C, Iftner T. 2010. Long-term absolute risk of cervical intraepithelial  
285 neoplasia grade 3 or worse following human papillomavirus infection: role of persistence. *J Natl Cancer*  
286 *Inst* 102:1478-88.10.1093/jnci/djq356

287 5. Munoz N, Bosch FX, Castellsague X, Diaz M, de Sanjose S, Hammouda D, Shah KV, Meijer CJ. 2004.  
288 Against which human papillomavirus types shall we vaccinate and screen? The international perspective.  
289 *Int J Cancer* 111:278-85.10.1002/ijc.20244

290 6. Alemany L, Saunier M, Alvarado-Cabrero I, Quiros B, Salmeron J, Shin HR, Pirog EC, Guimera N,  
291 Hernandez-Suarez G, Felix A, Clavero O, Lloveras B, Kasamatsu E, Goodman MT, Hernandez BY, Laco  
292 J, Tinoco L, Geraets DT, Lynch CF, Mandys V, Poljak M, Jach R, Verge J, Clavel C, Ndiaye C,  
293 Klaustermeier J, Cubilla A, Castellsague X, Bravo IG, Pawlita M, Quint WG, Munoz N, Bosch FX, de  
294 Sanjose S, Group HVS. 2015. Human papillomavirus DNA prevalence and type distribution in anal  
295 carcinomas worldwide. *Int J Cancer* 136:98-107.10.1002/ijc.28963

296 7. Giorgi-Rossi P, Franceschi S, Ronco G. 2012. HPV prevalence and accuracy of HPV testing to detect  
297 high-grade cervical intraepithelial neoplasia. *Int J Cancer* 130:1387-94.10.1002/ijc.26147

- 298 8. Li J, Zhang D, Zhang Y, Wang X, Lin Y, Hu L. 2011. Prevalence and genotype distribution of human  
299 papillomavirus in women with cervical cancer or high-grade precancerous lesions in Chengdu, western  
300 China. *Int J Gynaecol Obstet* 112:131-4. [10.1016/j.ijgo.2010.08.010](https://doi.org/10.1016/j.ijgo.2010.08.010)
- 301 9. Lorincz AT. 1996. Hybrid Capture method for detection of human papillomavirus DNA in clinical  
302 specimens: a tool for clinical management of equivocal Pap smears and for population screening. *J Obstet*  
303 *Gynaecol Res* 22:629-36, <https://www.ncbi.nlm.nih.gov/pubmed/9037955>
- 304 10. Cui M, Chan N, Liu M, Thai K, Malaczynska J, Singh I, Zhang D, Ye F. 2014. Clinical performance of  
305 Roche Cobas 4800 HPV Test. *J Clin Microbiol* 52:2210-1. [10.1128/JCM.00883-14](https://doi.org/10.1128/JCM.00883-14)
- 306 11. Wright TC, Jr., Stoler MH, Behrens CM, Apple R, Derion T, Wright TL. 2012. The ATHENA human  
307 papillomavirus study: design, methods, and baseline results. *Am J Obstet Gynecol* 206:46 e1-46  
308 [e11.10.1016/j.ajog.2011.07.024](https://doi.org/10.1016/j.ajog.2011.07.024)
- 309 12. Shah SS, Senapati S, Klacsmann F, Miller DL, Johnson JJ, Chang HC, Stack MS. 2016. Current  
310 Technologies and Recent Developments for Screening of HPV-Associated Cervical and Oropharyngeal  
311 Cancers. *Cancers (Basel)* 8. [10.3390/cancers8090085](https://doi.org/10.3390/cancers8090085)
- 312 13. Kleter B, van Doorn LJ, Schrauwen L, Molijn A, Sastrowijoto S, ter Schegget J, Lindeman J, ter  
313 Harmse B, Burger M, Quint W. 1999. Development and clinical evaluation of a highly sensitive  
314 PCR-reverse hybridization line probe assay for detection and identification of anogenital human  
315 papillomavirus. *J Clin Microbiol* 37:2508-17, <https://www.ncbi.nlm.nih.gov/pubmed/10405393>
- 316 14. Heideman DA, Hesselink AT, Berkhof J, van Kemenade F, Melchers WJ, Daalmeijer NF, Verkuijten M,  
317 Meijer CJ, Snijders PJ. 2011. Clinical validation of the cobas 4800 HPV test for cervical screening  
318 purposes. *J Clin Microbiol* 49:3983-5. [10.1128/JCM.05552-11](https://doi.org/10.1128/JCM.05552-11)
- 319 15. Stoler MH, Wright TC, Jr., Sharma A, Apple R, Gutekunst K, Wright TL, Group AHS. 2011. High-risk  
320 human papillomavirus testing in women with ASC-US cytology: results from the ATHENA HPV study. *Am*  
321 *J Clin Pathol* 135:468-75. [10.1309/AJCPZ5JY6FCVNMOT](https://doi.org/10.1309/AJCPZ5JY6FCVNMOT)
- 322 16. Chen W, Yu LL, Wang H, Fu CJ, Chen F, Cao YQ, Kang LN, Zhang X, Zhao FH, Geng L, Yu L. 2012.  
323 [Evaluation of cobas 4800 high-risk HPV test as a tool in cervical cancer screening and cytology triage].  
324 *Zhonghua Zhong Liu Za Zhi* 34:543-8. [10.3760/cma.j.issn.0253-3766.2012.07.014](https://doi.org/10.3760/cma.j.issn.0253-3766.2012.07.014)

325 17. Mollers M, King AJ, Knol MJ, Scherpenisse M, Meijer CJ, van der Klis FR, de Melker HE. 2015.  
326 Effectiveness of human papillomavirus vaccine against incident and persistent infections among young  
327 girls: Results from a longitudinal Dutch cohort study. *Vaccine* 33:2678-83.10.1016/j.vaccine.2015.04.016  
328 18. Cubie HA, Cuschieri K. 2013. Understanding HPV tests and their appropriate applications.  
329 *Cytology* 24:289-308.10.1111/cyt.12083  
330  
331  
332  
333  
334  
335  
336  
337  
338  
339  
340  
341  
342  
343  
344  
345  
346  
347  
348  
349  
350  
351  
352  
353  
354  
355  
356  
357  
358

**Table 1** Positivity rates of the five HPV tests according to histopathology classification, n (%)

| HPV test  | HPV type   | Normal (n = 121) | CIN1 (n = 15) | CIN2 (n = 39) | CIN3 (n = 31) | SCC (n = 4) | ALL (n = 210) | <i>P</i> value |
|-----------|------------|------------------|---------------|---------------|---------------|-------------|---------------|----------------|
| Tellgen   | HR-HPV     | 23 (19.01)       | 14 (93.33)    | 37 (94.87)    | 29 (93.55)    | 4 (100.0)   | 107 (50.95)   | <0.0001        |
|           | HPV16      | 13 (10.74)       | 3 (20.00)     | 20 (51.28)    | 20 (64.51)    | 4 (100.0)   | 60 (28.57)    | <0.0001        |
|           | HPV18      | 2 (1.65)         | 2 (13.33)     | 3 (7.69)      | 1 (3.22)      | 0 (0)       | 8 (3.81)      | 0.0765         |
|           | HPV others | 16 (13.22)       | 12 (80.00)    | 29 (74.35)    | 13 (41.94)    | 0 (0)       | 70 (33.33)    | <0.0001        |
| HybriBio  | HR-HPV     | 24 (19.83)       | 12 (80.00)    | 37 (94.87)    | 29 (93.55)    | 4 (100.0)   | 106 (50.48)   | <0.0001        |
|           | HPV16      | 13 (10.74)       | 2 (13.33)     | 19 (48.72)    | 20 (64.51)    | 4 (100.0)   | 58 (27.62)    | <0.0001        |
|           | HPV18      | 2 (1.65)         | 2 (13.33)     | 2 (5.13)      | 1 (3.22)      | 0 (0)       | 7 (3.33)      | 0.1014         |
|           | HPV others | 20 (15.53)       | 11 (73.33)    | 26 (66.67)    | 10 (32.26)    | 0 (0)       | 67 (31.90)    | <0.0001        |
| Liferiver | HR-HPV     | 25 (20.66)       | 14 (93.33)    | 38 (97.44)    | 28 (90.32)    | 4 (100.0)   | 109 (51.90)   | <0.0001        |
|           | HPV16      | 14 (11.57)       | 3 (20.00)     | 19 (48.72)    | 20 (64.51)    | 4 (100.0)   | 60 (28.57)    | <0.0001        |
|           | HPV18      | 3 (2.48)         | 2 (13.33)     | 3 (7.69)      | 2 (6.45)      | 0 (0)       | 10 (4.76)     | 0.1646         |

|         |            |            |            |            |            |           |             |         |
|---------|------------|------------|------------|------------|------------|-----------|-------------|---------|
|         | HPV others | 22 (18.18) | 13 (86.67) | 30 (76.92) | 13 (41.94) | 0 (0)     | 78 (37.14)  | <0.0001 |
| Sansure | HR-HPV     | 29 (23.97) | 12 (80.00) | 37 (94.87) | 30 (96.77) | 4 (100)   | 112 (53.33) | <0.0001 |
|         | HPV16      | 15 (12.40) | 2 (13.33)  | 18 (46.15) | 21 (67.74) | 4 (100)   | 60 (28.57)  | <0.0001 |
|         | HPV18      | 3 (2.48)   | 3 (20.00)  | 3 (7.69)   | 1 (3.22)   | 0 (0)     | 10 (4.76)   | 0.0517  |
|         | HPV others | 25 (20.66) | 11 (73.33) | 30 (76.92) | 12 (38.71) | 0 (0)     | 78 (37.14)  | <0.0001 |
| cobas   | HR-HPV     | 25 (20.66) | 11 (73.33) | 36 (92.31) | 29 (93.55) | 4 (100.0) | 105 (50.00) | <0.0001 |
|         | HPV16      | 13 (10.74) | 4 (26.67)  | 20 (51.28) | 21 (67.74) | 4 (100.0) | 62 (29.52)  | <0.0001 |
|         | HPV18      | 2 (1.65)   | 2 (13.33)  | 4 (10.26)  | 1 (3.22)   | 0 (0)     | 9 (4.28)    | 0.0433  |
|         | HPV others | 19 (15.70) | 10 (66.67) | 25 (64.10) | 11 (35.48) | 1 (25.00) | 66 (31.43)  | <0.0001 |

360 Abbreviations: CIN1, cervical intraepithelial neoplasia grade1; CIN2, cervical intraepithelial neoplasia grade 2; CIN3, cervical intraepithelial  
361 neoplasia grade 3; SCC, squamous cell carcinoma; HR-HPV, high-risk human papillomavirus.

362

363

364



365

366

367

368 **Table 2** Concordance rates between the results of the four HPV tests and the cobas test

|          |                        | cobas                  |                       | % Agreement (95%CI) |                 |                 | Kappa<br>(95%CI) | <i>p</i> value |
|----------|------------------------|------------------------|-----------------------|---------------------|-----------------|-----------------|------------------|----------------|
|          |                        |                        |                       | Overall             | Positive        | Negative        |                  |                |
| Tellgen  |                        | Positive (all)         | Negative              |                     |                 |                 |                  |                |
|          | Positive               | 101                    | 4                     | 95.24               | 94.39           | 96.12           | 0.905            | 0.5271         |
|          | Negative               | 6                      | 99                    | (91.46 - 97.39)     | (88.30 - 97.40) | (90.44 - 98.48) | (0.847 - 0.962)  |                |
|          |                        | Positive for<br>HPV16  | Negative for<br>HPV16 |                     |                 |                 |                  |                |
|          | Positive               | 57                     | 3                     | 96.19               | 91.94           | 97.97           | 0.908            | 0.4795         |
|          | Negative               | 5                      | 145                   | (92.66 - 98.06)     | (82.47 - 96.51) | (94.21 - 99.31) | (0.845 - 0.970)  |                |
|          | Positive for<br>HPV18  | Negative for<br>HPV18  |                       |                     |                 |                 |                  |                |
| Positive | 8                      | 0                      | 99.52                 | 88.89               | 100.00          | 0.939           | 0.3173           |                |
| Negative | 1                      | 201                    | (97.35 - 99.92)       | (56.05 - 98.01)     | (98.12-100)     | (0.819 - 1.000) |                  |                |
|          | Positive for<br>others | Negative for<br>others |                       |                     |                 |                 |                  |                |
| Positive | 58                     | 12                     | 90.48                 | 87.88               | 91.67           | 0.783           | 0.3711           |                |
| Negative | 8                      | 132                    | (85.75 - 93.75)       | (77.86 - 93.73)     | (86.00 - 95.17) | (0.692 - 0.873) |                  |                |
|          | Positive (all)         | Negative               |                       |                     |                 |                 |                  |                |

|           |                     |                         |                        |                 |                 |                 |                 |        |
|-----------|---------------------|-------------------------|------------------------|-----------------|-----------------|-----------------|-----------------|--------|
| HybriBio  | Positive            | 101                     | 5                      | 95.71           | 96.19           | 95.24           | 0.914           | 0.7389 |
|           | Negative            | 4                       | 100                    | (92.06 - 99.73) | (90.61 - 98.51) | (89.33 - 97.95) | (0.860 - 0.969) |        |
|           |                     | Positive for HPV16      | for Negative for HPV16 |                 |                 |                 |                 |        |
|           | Positive            | 58                      | 0                      | 98.10           | 93.55           | 100.00          | 0.953           | 0.0455 |
|           | Negative            | 4                       | 148                    | (95.21 - 99.26) | (84.55 - 97.46) | (97.47 - 100)   | (0.908 - 0.999) |        |
|           | Positive for HPV18  | for Negative for HPV18  |                        |                 |                 |                 |                 |        |
| Positive  | 6                   | 1                       | 98.10                  | 66.67           | 99.50           | 0.740           | 0.3173          |        |
| Negative  | 3                   | 200                     | (95.21 - 99.26)        | (35.42 - 87.94) | (97.24 - 99.91) | (0.496 - 0.985) |                 |        |
|           | Positive for others | for Negative for others |                        |                 |                 |                 |                 |        |
| Positive  | 58                  | 9                       | 91.90                  | 87.88           | 93.75           | 0.813           | 0.8084          |        |
| Negative  | 8                   | 135                     | (87.42 - 94.88)        | (77.86 - 93.73) | (88.55 - 96.68) | (0.728 - 0.898) |                 |        |
|           | Positive (all)      | Negative                |                        |                 |                 |                 |                 |        |
| Liferiver | Positive            | 102                     | 7                      | 95.24           | 97.14           | 93.33           | 0.905           | 0.2059 |
|           | Negative            | 3                       | 98                     | (91.46 - 97.39) | (91.93 - 99.02) | (86.87 - 96.73) | (0.847 - 0.962) |        |
|           |                     | Positive for HPV16      | for Negative for HPV16 |                 |                 |                 |                 |        |
|           | Positive            | 59                      | 1                      | 98.10           | 95.16           | 99.32           | 0.954           | 0.3173 |
|           | Negative            | 3                       | 147                    | (95.21 - 99.26) | (86.71 - 98.34) | (96.27 - 99.88) | (0.909 - 0.999) |        |
|           | Positive for HPV18  | for Negative for HPV18  |                        |                 |                 |                 |                 |        |
| Positive  | 8                   | 2                       | 98.57                  | 88.89           | 99.00           | 0.835           | 0.5637          |        |
| Negative  | 1                   | 199                     | (95.88 - 99.51)        | (56.05 - 98.01) | (96.45 - 99.73) | (0.651 - 1.000) |                 |        |
|           | Positive for        | for Negative for        |                        |                 |                 |                 |                 |        |

|         |          |                     |                     |                 |                 |                 |                 |        |
|---------|----------|---------------------|---------------------|-----------------|-----------------|-----------------|-----------------|--------|
|         |          | others              | others              |                 |                 |                 |                 |        |
|         | Positive | 61                  | 17                  | 89.52           | 92.42           | 88.19           | 0.768           |        |
|         | Negative | 5                   | 127                 | (84.65 - 92.98) | (83.46 - 96.72) | (81.91 - 92.50) | (0.677 - 0.859) | 0.0105 |
|         |          | Positive (all)      | Negative            |                 |                 |                 |                 |        |
| Sansure | Positive | 103                 | 9                   | 94.76           | 98.10           | 91.43           | 0.895           |        |
|         | Negative | 2                   | 96                  | (90.87 - 97.05) | (93.32 - 99.48) | (84.51 - 95.43) | (0.835 - 0.955) | 0.0348 |
|         |          | Positive for HPV16  | Negative for HPV16  |                 |                 |                 |                 |        |
|         | Positive | 56                  | 4                   | 95.24           | 90.32           | 97.30           | 0.885           |        |
|         | Negative | 6                   | 144                 | (91.46 - 97.39) | (80.45 - 95.49) | (93.26 - 98.94) | (0.815 - 0.954) | 0.5271 |
|         |          | Positive for HPV18  | Negative for HPV18  |                 |                 |                 |                 |        |
|         | Positive | 8                   | 2                   | 98.57           | 88.89           | 99.00           | 0.835           |        |
|         | Negative | 1                   | 199                 | (95.88 - 99.51) | (56.50 - 98.01) | (96.45 - 99.73) | (0.651 - 1.000) | 0.5637 |
|         |          | Positive for others | Negative for others |                 |                 |                 |                 |        |
|         | Positive | 59                  | 19                  | 87.62           | 89.39           | 86.81           | 0.726           |        |
|         | Negative | 7                   | 125                 | (82.48 - 91.41) | (79.69 - 94.77) | (80.31 - 91.39) | (0.629 - 0.824) | 0.0189 |

369  
370  
371  
372  
373  
374  
375  
376

377

378

379

380

381 **Table 3.** Ct values for concordant and discordant four HPV tests and the cobas test results.

|                   | Ct (all) Median | Ct (HPV16) Median | Ct (HPV18) Median | Ct (HPV others) Median |
|-------------------|-----------------|-------------------|-------------------|------------------------|
| Tellgen+/cobas+   | (20.03, 27.80)  | (18.42, 27.90)    | (19.44, 28.25)    | (20.75, 27.55)         |
| Tellgen-/cobas+   | (0, 38.75)      | (0, 36.90)        | (0, 35.10)        | (0, 38.90)             |
| Tellgen+/cobas-   | (25.42, 0)      | (26.30, 0)        | NA                | (24.71, 0)             |
| HybriBio+/cobas+  | (28.96, 27.75)  | (27.06, 28.15)    | (35.83, 27.30)    | (30.00, 27.55)         |
| HybriBio-/cobas+  | (0, 37.80)      | (0, 35.90)        | (0, 35.1)         | (0, 38.78)             |
| HybriBio+/cobas-  | (29.41, 0)      | NA                | (37.42, 0)        | (28.54, 0)             |
| Liferiver+/cobas+ | (24.24, 27.95)  | (23.47, 28.40)    | (22.84, 28.25)    | (25.05, 27.78)         |
| Liferiver-/cobas+ | (0, 38.80)      | (0, 36.9)         | (0, 35.10)        | (0, 39.00)             |
| Liferiver+/cobas- | (34.84, 0)      | (37.48, 0)        | (37.09, 0)        | (34.32, 0)             |
| Sansure+/cobas+   | (27.83, 27.80)  | (27.76, 27.80)    | (30.69, 28.25)    | (27.73, 27.60)         |
| Sansure-/cobas+   | (0, 38.75)      | (0, 38.70)        | (0, 35.10)        | (0, 38.80)             |
| Sansure+/cobas-   | (36.03, 0)      | (37.83, 0)        | ( 35.10, 0)       | (34.22, 0)             |

382 Abbreviations: Ct: Cycle threshold; Tellgen Cutoff: 30; HybriBio Cutoff: 36; Liferiver Cutoff: 38; Sansure Cutoff: 39; cobas Cutoff: 40.5; NA:

383 not available;

384

385 **Table4** Discordant results between the four HPV tests and cobas HPV test for HR-HPV compared to histopathology and

386 INNO-LiPA

| Subject ID | Result by:<br>histopathology | Tellgen    | HybriBio   | Liferiver  | Sansure    | cobas      | INNO-LiPA | Test result interpretation                          |
|------------|------------------------------|------------|------------|------------|------------|------------|-----------|-----------------------------------------------------|
| A004       | Normal                       | <u>POS</u> | NEG        | <u>POS</u> | <u>POS</u> | NEG        | NGE       | False positive (Tellgen, Liferiver and Sansure)     |
| A008       | CIN2                         | <u>NEG</u> | <u>NEG</u> | POS        | <u>NEG</u> | <u>NEG</u> | HPV82     | False negative (Sansure) or untargeted <sup>a</sup> |
| A009       | CIN3                         | POS        | POS        | <u>NEG</u> | POS        | POS        | HPV33     | False negative (Liferiver)                          |
| A012       | Normal                       | POS        | POS        | POS        | <u>NEG</u> | <u>NEG</u> | HPV39,66  | False negative (Sansure and cobas)                  |
| A020       | CIN3                         | POS        | <u>NEG</u> | POS        | POS        | POS        | HPV16     | False negative (HybriBio)                           |
| A040       | CIN2                         | POS        | POS        | POS        | POS        | <u>NEG</u> | HPV52     | False negative (cobas)                              |
| A042       | CIN3                         | <u>NEG</u> | POS        | POS        | POS        | POS        | HPV16     | False negative (Tellgen)                            |
| A054       | Normal                       | NEG        | NEG        | <u>POS</u> | NEG        | NEG        | NEG       | False positive (Liferiver)                          |
| A064       | CIN3                         | POS        | POS        | <u>NEG</u> | POS        | <u>NEG</u> | HPV53     | False negative (Liferiver and cobas) or untargeted  |
| A075       | Normal                       | <u>POS</u> | NEG        | NEG        | NEG        | NEG        | NEG       | False positive (Tellgen)                            |
| A100       | Normal                       | POS        | POS        | POS        | POS        | <u>NEG</u> | HPV52     | False negative (cobas)                              |
| A112       | Normal                       | NEG        | NEG        | NEG        | NEG        | <u>POS</u> | NEG       | False positive (cobas)                              |
| A127       | Normal                       | NEG        | NEG        | NEG        | <u>POS</u> | NEG        | NEG       | False positive (Sansure)                            |
| A128       | Normal                       | NEG        | NEG        | <u>POS</u> | NEG        | NEG        | NEG       | False positive (Liferiver)                          |
| A131       | Normal                       | NEG        | NEG        | NEG        | <u>POS</u> | NEG        | NEG       | False positive (Sansure)                            |
| A132       | Normal                       | NEG        | NEG        | NEG        | <u>POS</u> | NEG        | NEG       | False positive (Sansure)                            |
| A133       | Normal                       | NEG        | NEG        | NEG        | <u>POS</u> | NEG        | NEG       | False positive (Sansure)                            |
| A187       | Normal                       | NEG        | NEG        | NEG        | NEG        | <u>POS</u> | NEG       | False positive (cobas)                              |

|      |        |            |            |            |            |            |                   |                                                       |
|------|--------|------------|------------|------------|------------|------------|-------------------|-------------------------------------------------------|
| A192 | Normal | POS        | <u>NEG</u> | POS        | POS        | POS        | HPV16,56          | False negative (HybriBio)                             |
| A197 | Normal | NEG        | NEG        | NEG        | <u>POS</u> | NEG        | HPV43             | False negative (cobas)                                |
| A202 | Normal | <u>NEG</u> | POS        | POS        | POS        | POS        | HPV18,31,52,59,74 | False negative (Tellgen)                              |
| A209 | Normal | <u>NEG</u> | POS        | <u>NEG</u> | <u>NEG</u> | <u>NEG</u> | HPV18,51          | False negative (Tellgen, Liferive, Sansure and cobas) |

387 Abbreviations: POS: Positive; NEG: Negative; CIN2: cervical intraepithelial neoplasia grade 2; CIN3: cervical intraepithelial neoplasia grade 3;

388 a: Lesion caused by HPV genotypes not targeted by cobas or the four HR-HPV tests; Underline: discordant results with LiPA test.

389

390

391

392

393

394

395

396

397

398

399

400

401 **Table 5** Clinical performance of these HR-HPV tests for detection of CIN2+ in women with positive HPV results.

| Endpoint       | HPV test  | Sensitivity (95%CI)   | Specificity (95%CI)   | PPV (95%CI)           | NPV (95%CI)           |
|----------------|-----------|-----------------------|-----------------------|-----------------------|-----------------------|
| CIN2+ (n = 74) | Tellgen   | 94.59 (86.91 - 97.88) | 72.79 (64.77 - 79.57) | 65.42 (56.02 - 73.76) | 96.12 (90.44 - 98.48) |
|                | HybriBio  | 94.59 (86.91 - 97.88) | 73.53 (65.54 - 80.22) | 66.04 (56.60 - 74.35) | 96.15 (90.53 - 98.49) |
|                | Liferiver | 94.59 (86.91 - 97.88) | 71.32 (63.22 - 78.26) | 64.22 (54.88 - 72.59) | 96.04 (90.26 - 98.45) |
|                | Sansure   | 95.95 (88.75 - 98.61) | 69.86 (61.68 - 76.93) | 63.39 (54.17 - 71.73) | 96.94 (91.38 - 98.95) |
|                | cobas     | 93.24 (85.14 - 97.08) | 73.53 (65.54 - 80.22) | 65.71 (56.23 - 74.09) | 95.24 (89.33 - 97.95) |

402 Abbreviations: CIN2+: cervical intraepithelial neoplasia grade 2 or higher; CI: confidence interval; PPV: positive predictive value; NPV:  
 403 negative predictive value.

404
